# Supplementary material for: Comparison and evaluation of pathway-level aggregation methods of gene expression data
Source: PubMed Central journal article supplement (PMC3521227; doi:10.1186/1471-2164-13-s7-s26), 2012-12-07
Supplement: 1471-2164-13-S7-S26-S1.pdf [file 1471-2164-13-S7-S26-S1.pdf]

# Additional file 1: Schematic and mathematical description of the pathway-level aggregation methods

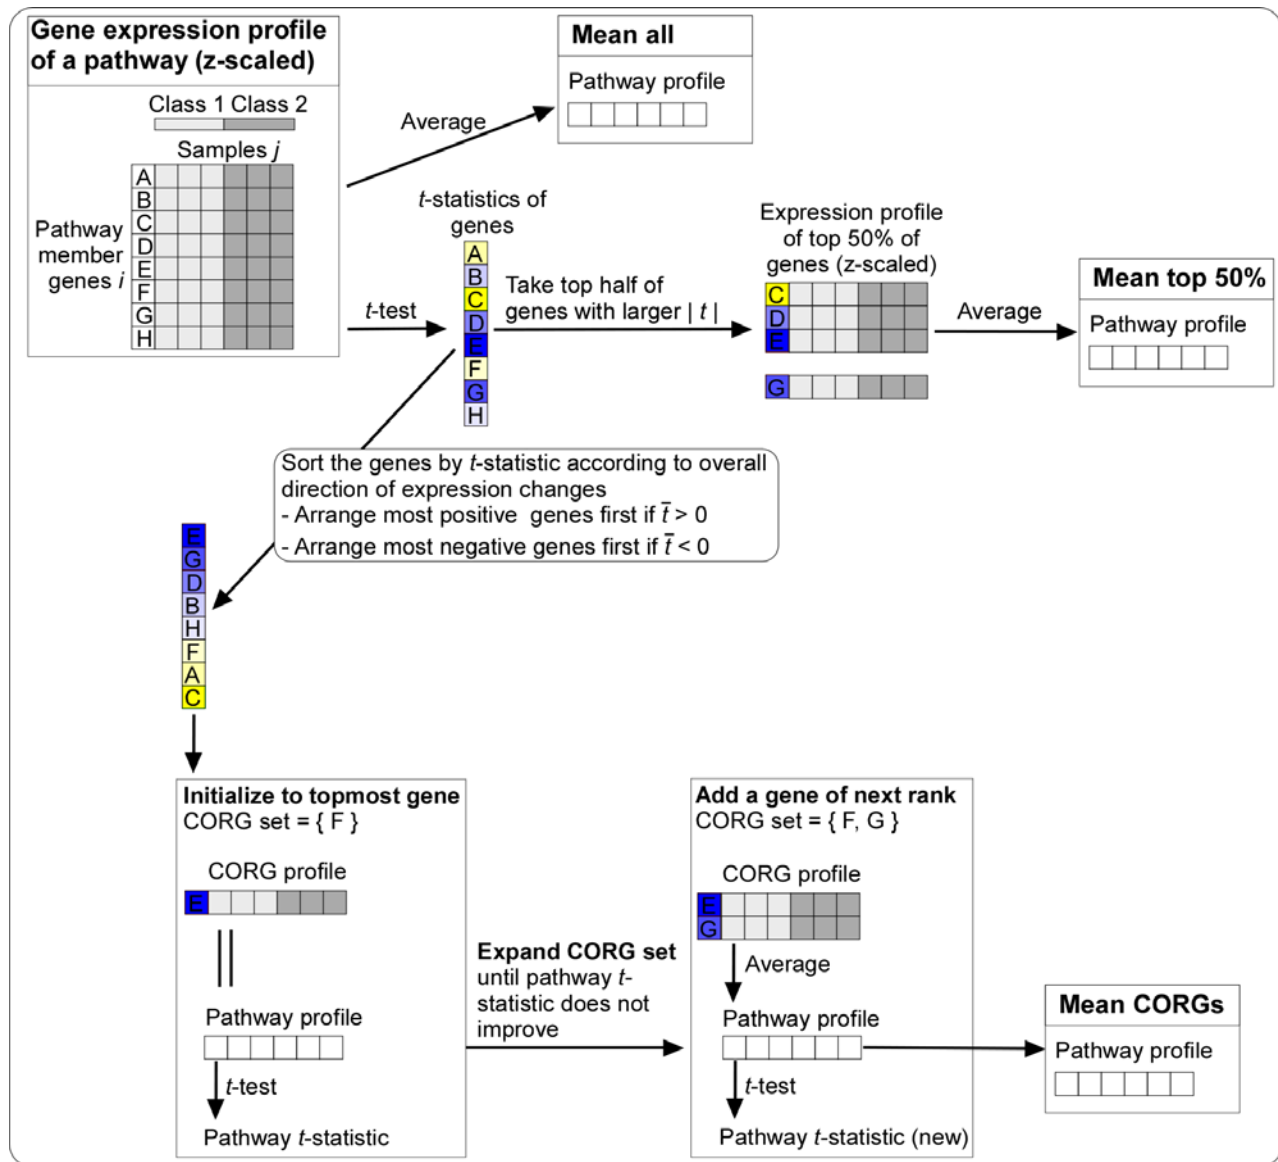

**Schematic of the three mean-based methods.** Algorithmic steps in *Mean all*, *Mean top 50%*, and *Mean CORGs* are schematized.

## Mathematical description of the mean-based methods

Given a gene expression data with  $n$  samples and a pathway whose  $m$  member genes are represented in the data, let an  $m \times n$  matrix  $\mathbf{X}$  be a  $z$ -scaled gene expression profile of the pathway's member genes. Then, each element  $x_{ij}$  is a  $z$ -scaled expression level of a member gene  $i$  in sample  $j$ . Pathway-level aggregation methods seek to derive a pathway expression profile  $\mathbf{a}$  which is a vector with  $n$  elements.

### Mean all

Each element  $a_j$  is calculated as

$$a_j = \frac{1}{m} \sum_{i=1}^m x_{ij} \quad (1)$$

### Mean top 50%

The member genes' expression profile is subject to Student's  $t$ -test. Then, the member genes are sorted by  $|t|$  in descending order, or equivalently, by  $p$ -value in ascending order. The top 50% of the member genes are selected, and their gene expression profile is averaged as in Equation (1).

### Mean CORGs

The member genes' expression profile is subject to Student's  $t$ -test. Overall direction of the pathway's expression change is found by the sign of the mean of all the member genes'  $t$ -statistics ( $\bar{t}$ ). Then, the member genes are sorted by  $t$ -statistic according to the overall direction;

Descending order if  $\bar{t} > 0$  (Most up-regulated genes are arranged to the top)

Ascending order if  $\bar{t} < 0$  (Most down-regulated genes are arranged to the top)

In this way, a sorted list of member genes  $\{g_1, g_2, g_3, \dots, g_m\}$  is obtained.

Let  $G_k$  be a set of CORGs containing top  $k$  member genes. Then each element  $a_j$  is given by;

$$a_j = \frac{1}{\sqrt{k}} \sum_{i=1}^k x_{ij} \quad (2)$$

where the sum is divided by square root of  $k$  to stabilize variance.

Let  $S(G_k)$  the pathway-level  $t$ -statistic obtained from  $\mathbf{a}$ . Finding CORG set amounts to identify optimal  $k$  member genes that maximize the pathway-level  $t$ -statistic.

The CORG set is iteratively expanded until the pathway-level  $t$ -statistic does not improve, at which point the final CORG set and its aggregated pathway expression profile  $\mathbf{a}$  is returned, as shown in the pseudocode;

Initialize  $G_0 = \{ \}$  and  $S(G_0) = 0$

FOR  $i = 1$  to  $m$

    Add the next ranked gene  $g_i$  to CORG set  $G_i$

    Aggregate the member genes' expression by Equation (2) to obtain  $\mathbf{a}$

    Perform  $t$ -test on  $\mathbf{a}$  to obtain  $S(G_i)$

    IF  $|S(G_i)| < |S(G_{i-1})|$

        BREAK

END FOR

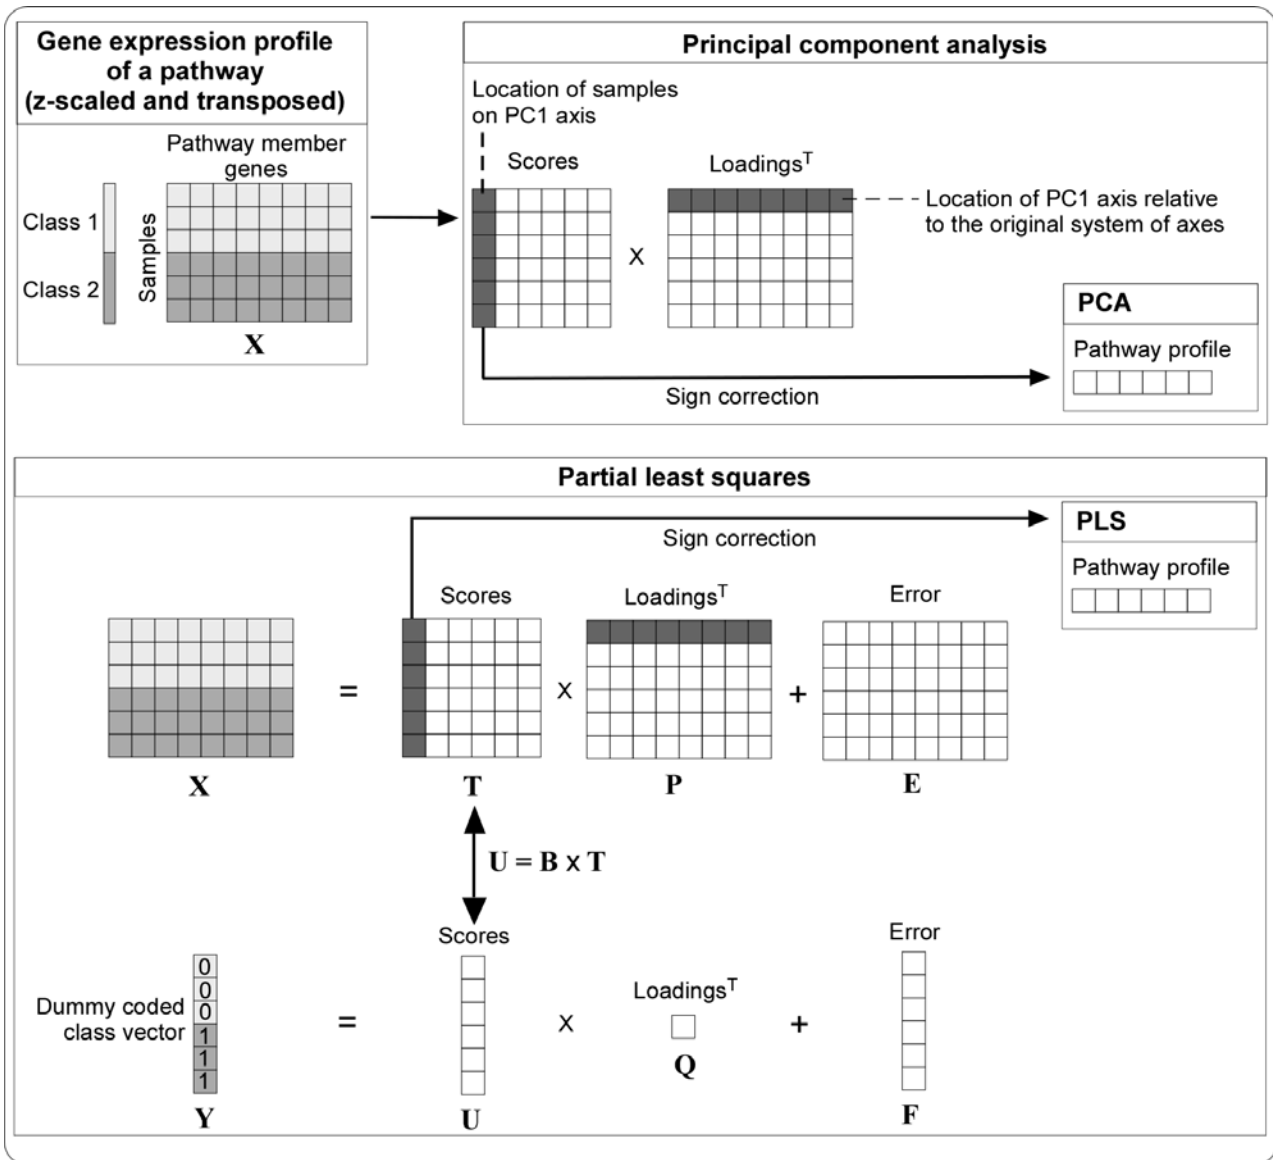

Schematic of the two projection-based methods. Algorithmic steps in PCA and PLS are schematized.

## Mathematical description of the projection-based methods

### PCA (Principal Component Analysis)

PCA expects a data matrix in which samples are arranged in rows and variables in columns. Thus the aforementioned  $m \times n$  matrix  $\mathbf{X}$  needs to be transposed to an  $n \times m$  matrix so that samples are arranged in rows and genes in columns. To simplify notation, the transposed matrix  $\mathbf{X}^T$  will be referred to simply as  $\mathbf{X}$  from now on.

#### Method 1. PCA by singular value decomposition (SVD) of $\mathbf{X}$

PCA can be performed by SVD of  $\mathbf{X}$ , which yields the factorization

$$\mathbf{X} = \mathbf{U}\mathbf{\Sigma}\mathbf{V}^T \quad (3)$$

where

$\mathbf{U}$  is an  $n \times n$  orthogonal matrix

$\mathbf{\Sigma}$  is an  $n \times n$  diagonal matrix

$\mathbf{V}$  is an  $m \times n$  orthogonal matrix.

The matrix product  $\mathbf{U}\mathbf{\Sigma}$  is called the scores, in which each column gives the location of  $n$  samples with each PC axis. The matrix  $\mathbf{V}$  is called the loadings, in which each column gives the location of each PC axis relative to the original system of  $m$  axes. First column in the scores matrix is taken as the pathway expression profile vector  $\mathbf{p}$ .

#### Method 2. PCA by eigenvalue decomposition of a covariance matrix of $\mathbf{X}$

Alternatively, PCA can be performed by eigenvalue decomposition of a covariance matrix of  $\mathbf{X}$ .

An  $m \times m$  symmetric matrix  $\mathbf{C}$  which is given by the following equation

$$\mathbf{C} = \frac{1}{n-1} \mathbf{X}^T \mathbf{X} \quad (4)$$

is called the covariance matrix of  $\mathbf{X}$  (if  $\mathbf{X}$  is mean-centered) or correlation matrix of  $\mathbf{X}$  (if  $\mathbf{X}$  is mean-centered and divided by standard deviation; i.e., z-scaled).

Since  $\mathbf{C}$  is a symmetric matrix,  $\mathbf{C}$  is an orthogonal matrix and orthogonally diagonalizable. Thus,  $\mathbf{C}$  has  $n$  linearly independent eigenvectors  $\mathbf{p}$  such that

$$\mathbf{C}\mathbf{p}_i = d_i\mathbf{p}_i, \quad i = 1, \dots, m \quad (5)$$

where  $\mathbf{p}_i$  is  $i$ -th eigenvector and  $d_i$  is corresponding eigenvalue.

In matrix form, Equation (5) can be written as

$$\mathbf{C}\mathbf{P} = \mathbf{P}\mathbf{D} \quad (6)$$

where  $\mathbf{D} = \text{diag}\{d_1, \dots, d_m\}$

Since  $\mathbf{P}$  is an orthogonal matrix, it holds that  $\mathbf{P}^T = \mathbf{P}^{-1}$ . Thus Equation (6) can be written as

$$\mathbf{C} = \mathbf{P}\mathbf{D}\mathbf{P}^T \quad (7)$$

where

$\mathbf{P}$  is an  $m \times m$  orthogonal matrix whose columns are eigenvectors of  $\mathbf{C}$

$\mathbf{D}$  is an  $m \times m$  diagonal matrix whose diagonal entries are eigenvalues of  $\mathbf{C}$ .

### Relationship between the two methods

It can be seen that the two aforementioned approaches yield the same results as shown below.

From Equation (3),  $\mathbf{X}^T\mathbf{X}$  is given by

$$\mathbf{X}^T\mathbf{X} = (\mathbf{U}\boldsymbol{\Sigma}\mathbf{V}^T)^T (\mathbf{U}\boldsymbol{\Sigma}\mathbf{V}^T) = (\mathbf{V}\boldsymbol{\Sigma}\mathbf{U}^T)(\mathbf{U}\boldsymbol{\Sigma}\mathbf{V}^T) = (\mathbf{V}\boldsymbol{\Sigma})(\mathbf{U}^T\mathbf{U})(\boldsymbol{\Sigma}\mathbf{V}^T) = (\mathbf{V}\boldsymbol{\Sigma})(\mathbf{I})(\boldsymbol{\Sigma}\mathbf{V}^T) = \mathbf{V}\boldsymbol{\Sigma}^2\mathbf{V}^T$$

From Equations (4) and (7),  $\mathbf{X}^T\mathbf{X}$  is given by

$$\mathbf{X}^T\mathbf{X} = (n-1)\mathbf{C} = (n-1)\mathbf{P}\mathbf{D}\mathbf{P}^T$$

Thus, it follows that  $\mathbf{V} = \mathbf{P}$  and  $(n-1)\mathbf{D} = \boldsymbol{\Sigma}^2$ .

### How to perform PCA in R

For the  $z$ -scaled and transposed  $n \times m$  matrix  $\mathbf{X}$ , PCA can be performed by either `prcomp()` or `svd()`, yielding the same results. First column of the resultant scores matrix is taken as the pathway expression vector  $\mathbf{a}$ .

Using `prcomp()`

```
PCA <- prcomp(X, center=F, scale=F)
Scores <- PCA$x
PathwayExpressionVector <- Scores[,1]
```

Using `svd()`

```
SVD <- svd(X)
U <- SVD$u
D <- diag(SVD$d)
Scores <- U %*% D
PathwayExpressionVector <- Scores[,1]
```

In the analysis shown in the paper, `moduleEigengenes()` function in `WGCNA` package was used, which use `svd()`. To correct the sign of the elements in the pathway expression vector  $\mathbf{a}$ , the function was called with the `align` parameter as follows;

```
dummyColors <- rep("grey", numberOfMemberGenes)
ME <- moduleEigengenes(X, align="along average", scale=F, color=dummyColors)
PathwayExpressionVector <- ME$eigengenes[[1]]
```

### PLS (Partial Least Squares)

PLS seeks to find a regression model between  $\mathbf{T}$  and  $\mathbf{U}$  (the principal component scores of  $\mathbf{X}$  and those of  $\mathbf{Y}$ , respectively).

The matrix  $\mathbf{X}$  is decomposed into a score matrix  $\mathbf{T}$  and a loading matrix  $\mathbf{P}$ , and an error term  $\mathbf{E}$ . The matrix  $\mathbf{Y}$  is decomposed into a score matrix  $\mathbf{U}$  and a loading matrix  $\mathbf{Q}$ , and an error term  $\mathbf{F}$ . In two-class classification problems, the matrix  $\mathbf{Y}$  is a dummy coded class vector. The goal of PLS is to minimize the norm of  $\mathbf{F}$  while keeping the correlation between  $\mathbf{X}$  and  $\mathbf{Y}$  by the relation  $\mathbf{U} = \mathbf{B}\mathbf{T}$ .

## How to perform PLS in R

For the  $z$ -scaled and transposed  $n \times m$  matrix  $\mathbf{X}$ , and a dummy coded class vector  $\mathbf{Y}$ , PLS can be performed by pls package. First column of the resultant scores matrix is taken as the pathway expression vector  $\mathbf{a}$ . Sign correction can be done by using 0(control)/1(case) coding for an overall up-regulated pathway and 1(control)/0(case) coding for an overall down-regulated pathway.

```
Data <- data.frame(Y, X)
PLS <- pls(Y~X, ncomp=2, data=Data, validation="LOO") #ncomp value does not
matter since we use only the first component
PathwayExpressionVector <- PLS$scores[,1]
```

## Mathematical description of the ASSESS method

Since this algorithm is comparably complex, interested readers are advised to refer to the original article for a precise mathematical description of the algorithm (Edelman E, Porrello A, Guinney J, Balakumaran B, Bild A, Febbo PG, Mukherjee S: Analysis of sample set enrichment scores: assaying the enrichment of sets of genes for individual samples in genome-wide expression profiles. *Bioinformatics* 2006, 22:e108-e116)
